# Supplementary material
Source: PubMed Central journal article supplement (PMC7210434)
Supplement: AJA-28-823-s002.pdf [file AJA-28-823-s002.pdf]

## **Supplemental Material S2.** Example script for standard audiometry.

### Otoscopy:

*Audiologist:* "Look at this light. I can see it on your hand [shine light onto child's hand]."

"I can see it on your arm [shine light onto child's arm]."

"I am going to use this light to look in your ear."

### Tympanometry:

*Audiologist:* "Look at this [point to tympanometry tip]!"

"It's squishy/soft. You can touch it. It's going to go in your ear [puts probe in child's ear]."

"I am going to count to five and it will all be done."

### Otoacoustic Emissions:

*Audiologist:* "Time to listen! This is soft, too [allow child to touch probe]."

"This will go in your ear. All you have to do is listen to the music and it will all be done."

### Putting on Headphones/Inserts:

*Audiologist:* "These are soft and will go in your ears. You can touch it [allow child to touch inserts/headphones]."

"You will hear sounds with these. The sounds won't be loud."

### Word Recognition Threshold (Picture Pointing):

*Audiologist:* "I'm going to say some words. Touch the picture of the word you hear."

### Word Recognition Threshold (Standard):

*Audiologist:* "I'm going to say some words. All you have to do is say the word that I say."

### Pure Tone Testing:

*Audiologist:* "Now you are going to listen for some beeps. Every time you hear a beep, raise your hand really high."
